# Supplementary material for: Longitudinal Association of Non‐Alcoholic Fatty Liver Disease With Changes in Myocardial Structure and Function: The CARDIA Study
Source: PubMed Central journal article supplement — J Am Heart Assoc. 2020 Feb 6;9(4):e014279. doi: 10.1161/JAHA.119.014279 (PMC7070184; doi:10.1161/jaha.119.014279), 2020-02-06
Supplement: JAH3-9-e014279-s001.pdf [file JAH3-9-e014279-s001.pdf]

# **SUPPLEMENTAL MATERIAL**

**Table S1. Logistic Regression Analyses for the Longitudinal Association of NAFLD with Quartiles of Change in Longitudinal Strain from Y25 (2010-2011) to Y30 (2015-2016) in CARDIA.**

| Quartiles of Change in Longitudinal Strain from Y25 to Y30 |                         |        |                      |          |                     |                  |                       |                  |
|------------------------------------------------------------|-------------------------|--------|----------------------|----------|---------------------|------------------|-----------------------|------------------|
| Odds Ratio (95% Confidence Interval)                       |                         |        |                      |          |                     |                  |                       |                  |
|                                                            | Q1<br>(-10.68 to -1.99) |        | Q2<br>(-1.98 to .03) |          | Q3<br>(.04 to 1.88) |                  | Q4<br>(1.89 to 11.57) |                  |
|                                                            | OR                      | 95% CI | OR                   | 95% CI   | OR                  | 95% CI           | OR                    | 95% CI           |
| Base Model†                                                | <b>REFERENCE</b>        |        | 1.59                 | .90-2.80 | <b>1.94</b>         | <b>1.09-3.44</b> | <b>3.20</b>           | <b>1.72-5.94</b> |
| Multivariable‡                                             |                         |        | 1.55                 | .86-2.79 | <b>1.84</b>         | <b>1.01-3.35</b> | <b>2.98</b>           | <b>1.56-5.70</b> |
| + HF risk factors§                                         |                         |        | 1.52                 | .79-2.92 | 1.39                | .71-2.72         | <b>2.24</b>           | <b>1.06-4.73</b> |
| Multivariable‡<br>+ HF RFs+<br>BMI                         |                         |        | 1.69                 | .87-3.27 | 1.53                | .78-3.01         | 2.09                  | .99-4.38         |
| Multivariable‡<br>+ HF RFs+<br>%change<br>BMI^             |                         |        | 1.63                 | .51-1.70 | 1.49                | .43-2.39         | 2.10                  | .53-1.71         |

|                                                                                 |  |      |          |      |          |      |          |
|---------------------------------------------------------------------------------|--|------|----------|------|----------|------|----------|
| Multivariable <sup>‡</sup><br>+HF RFs +<br>VAT                                  |  | 1.52 | .77-2.99 | 1.49 | .75-2.96 | 1.90 | .89-4.09 |
| Multivariable <sup>‡</sup><br>+ HF RFs+<br>BMI +<br>%change<br>BMI <sup>^</sup> |  | 1.08 | .59-1.98 | .87  | .48-1.58 | 1.01 | .56-1.83 |

NAFLD, nonalcoholic fatty liver disease; CARDIA, Coronary Artery Risk Development in Young Adults; Q, quartile; OR, odds ratio; 95%CI, 95% confidence interval

\*Result from multinomial model with normal geometry as referent<sup>24</sup>

<sup>†</sup>adjusted for center only

<sup>‡</sup> Multivariable model: adjusted for age, race, sex, study center, education, income level, alcohol intake (drinks/week), smoking status (current/former vs. never), physical activity score

<sup>§</sup>HF risk factors: systolic blood pressure, antihypertensive medication use, anti-hyperlipidemic medication use, total cholesterol, HDL cholesterol, diabetes status, and GFR

<sup>^</sup>%change BMI = (Y30 BMI – Y25 BMI)/Y25 BMI X 100

**Table S2. Odds Ratios (95% Confidence Interval) for the Longitudinal Association of Continuous Liver Attenuation with Prevalent and Incident Abnormal Left Ventricular Geometry and Remodeling, The CARDIA Study.**

|                                                | Prevalent Abnormal LV Geometry and Remodeling |                        |                         | Incident Abnormal LV Geometry and Remodeling |                      |                               |
|------------------------------------------------|-----------------------------------------------|------------------------|-------------------------|----------------------------------------------|----------------------|-------------------------------|
|                                                | Prevalent LVH                                 | Concentric Remodeling* | Concentric Hypertrophy* | Eccentric Hypertrophy*                       | Incident LVH         | Incident Abnormal LV Geometry |
| Base Model†                                    | <b>.96 (.95-.97)</b>                          | .99 (.97-1.00)         | <b>.96 (.95-.97)</b>    | <b>.96 (.95-1.00)</b>                        | <b>.97 (.95-.98)</b> | <b>.97 (.96-.98)</b>          |
| Multivariable‡                                 | <b>.96 (.95-.97)</b>                          | .99 (.98-1.05)         | <b>.96 (.95-.97)</b>    | <b>.95 (.94-.97)</b>                         | <b>.96 (.95-.98)</b> | <b>.97 (.96-.98)</b>          |
| + HF risk factors§                             | <b>.99 (.97-1.0)</b>                          | .99 (.98-1.01)         | .99 (.98-1.01)          | <b>.98 (.96-.99)</b>                         | <b>.98 (.96-.99)</b> | <b>.98 (.97-.99)</b>          |
| Multivariable‡<br>+ HF RFs+<br>BMI             | 1.00 (.99-1.01)                               | 1.0 (.98-1.02)         | 1.01 (.99-1.03)         | .99 (.97-1.01)                               | 1.00 (.98-1.02)      | .99 (.98-1.01)                |
| Multivariable‡<br>+ HF RFs+<br>%change<br>BMI^ | <b>.98 (.97-.99)</b>                          | 1.0 (.98-1.01)         | .98 (.97-1.01)          | <b>.98 (.97-.99)</b>                         | <b>.98 (.96-.99)</b> | <b>.98 (.97-.99)</b>          |

|                                                                                 |                 |                 |                 |                      |                |                      |
|---------------------------------------------------------------------------------|-----------------|-----------------|-----------------|----------------------|----------------|----------------------|
| Multivariable <sup>‡</sup><br>+HF RFs +<br>VAT                                  | .99 (.98-1.01)  | 1.0 (.98-1.02)  | 1.01 (.99-1.03) | <b>.99 (.97-.99)</b> | .99 (.97-1.01) | <b>.99 (.97-.99)</b> |
| Multivariable <sup>‡</sup><br>+ HF RFs+<br>BMI +<br>%change<br>BMI <sup>^</sup> | 1.00 (.98-1.01) | 1.11 (.62-1.99) | 1.06 (.61-1.84) | 1.41 (.86-2.33)      | 1.0 (.98-1.02) | .99 (.98-1.01)       |

CARDIA, Coronary Artery Risk Development in Young Adults; LV, left ventricle; HF, heart failure; BMI, body mass index; LVM, left ventricular mass; RWT, relative wall thickness; VAT, visceral adipose tissue; OR, odds ratio; 95%CI, 95% confidence interval

LVH was defined as LVM indexed to body surface area (LVMI) >115 g/m<sup>2</sup> (men) or >95 g/m<sup>2.7</sup> (women); Concentric remodeling was defined as RWT > 0.42 and LVH; Concentric hypertrophy was defined as RWT > 0.42 and LVH; Eccentric hypertrophy was defined as RWT ≤ 0.42 and LVH; Any abnormal LV geometry was defined as either concentric hypertrophy or concentric remodeling or eccentric hypertrophy.<sup>24</sup>

\*Result from multinomial model with normal geometry as referent<sup>24</sup>

† adjusted for center only

‡ Multivariable model: adjusted for Y25 age, race, sex, study center, education, income level, alcohol intake (drinks/week), smoking status (current vs. former/never), physical activity score

§ HF risk factors: Y25 systolic blood pressure, antihypertensive medication use, anti-hyperlipidemic medication use, total cholesterol, HDL cholesterol, diabetes status, GFR, and Y25 echo measures (e.g., Y25 LVM/BSA (LVH model) or Y25 LV RWT (LV remodeling models))

<sup>^</sup>%change BMI = (Y30 BMI – Y25 BMI)/Y25 BMI X 100

**Table S3. Linear Regression Analyses for the Longitudinal Association of Continuous Liver Attenuation with Prevalent Left Ventricular Function, The CARDIA Study, 2015-2016.**

| <b>Y30 Markers of LV Function</b>                         |                  |                  |                     |                  |                    |                  |                            |                  |                       |                  |
|-----------------------------------------------------------|------------------|------------------|---------------------|------------------|--------------------|------------------|----------------------------|------------------|-----------------------|------------------|
|                                                           | <b>LVEF</b>      |                  | <b>E/A ratio</b>    |                  | <b>E/e' ratio</b>  |                  | <b>Longitudinal Strain</b> |                  | <b>Cardiac output</b> |                  |
|                                                           | $\beta$ (SE)     | P-value          | $\beta$ (SE)        | P-value          | $\beta$ (SE)       | P-value          | $\beta$ (SE)               | P-value          | $\beta$ (SE)          | P-value          |
| Base Model <sup>†</sup>                                   | <b>.05 (.01)</b> | <b>&lt;.0001</b> | <b>.005 (.04)</b>   | <b>&lt;.0001</b> | <b>-.02 (.005)</b> | <b>.0003</b>     | <b>-.05 (.006)</b>         | <b>&lt;.0001</b> | <b>-.03 (.003)</b>    | <b>&lt;.0001</b> |
| Multivariable <sup>‡</sup>                                | <b>.03 (.01)</b> | <b>.03</b>       | <b>.005 (.0008)</b> | <b>&lt;.0001</b> | <b>-.03 (.005)</b> | <b>&lt;.0001</b> | <b>-.04 (.006)</b>         | <b>&lt;.0001</b> | <b>-.03 (.003)</b>    | <b>&lt;.0001</b> |
| + HF risk factors <sup>§</sup>                            | .02 (.01)        | .09              | <b>.003 (.0008)</b> | <b>&lt;.0001</b> | <b>-.01 (.006)</b> | <b>.01</b>       | <b>-.02 (.007)</b>         | <b>.01</b>       | <b>-.03 (.003)</b>    | <b>&lt;.0001</b> |
| Multivariable <sup>‡</sup><br>+ HF RFs+<br>BMI            | .02 (.01)        | .21              | <b>.002 (.0009)</b> | <b>.005</b>      | <b>-.01 (.006)</b> | <b>.04</b>       | -.01 (.008)                | .10              | <b>-.01 (.003)</b>    | <b>.001</b>      |
| Multivariable <sup>‡</sup><br>+ HF RFs+<br>%change<br>BMI | <b>.02 (.01)</b> | <b>.05</b>       | <b>.003 (.0008)</b> | <b>&lt;.0001</b> | <b>-.02 (.006)</b> | <b>.007</b>      | <b>-.02 (.007)</b>         | <b>.007</b>      | <b>-.03 (.003)</b>    | <b>&lt;.0001</b> |

|                                                                                 |           |     |                         |             |               |     |              |     |                     |              |
|---------------------------------------------------------------------------------|-----------|-----|-------------------------|-------------|---------------|-----|--------------|-----|---------------------|--------------|
| Multivariable <sup>‡</sup><br>+HF RFs +<br>VAT                                  | .02 (.01) | .18 | <b>.002<br/>(.0009)</b> | <b>.049</b> | -0.009 (.006) | .13 | -0.01 (.008) | .20 | <b>-0.01 (.003)</b> | <b>.0005</b> |
| Multivariable <sup>‡</sup><br>+ HF RFs+<br>BMI +<br>%change<br>BMI <sup>^</sup> | .02 (.01) | .19 | <b>.003<br/>(.0009)</b> | <b>.005</b> | -0.01 (.006)  | .07 | -0.01 (.008) | .08 | <b>-0.01 (.003)</b> | <b>.0005</b> |

CARDIA, Coronary Artery Risk Development in Young Adults; LVEF, left ventricular ejection fraction; HF, heart failure; BMI, body mass index; VAT, visceral adipose tissue

<sup>†</sup>adjusted for center only

<sup>‡</sup>Multivariable model: adjusted for age, race, sex, study center, education, income level, alcohol intake (drinks/week), smoking status (current/former vs. never), physical activity score

<sup>§</sup>HF risk factors: systolic blood pressure, antihypertensive medication use, anti-hyperlipidemic medication use, total cholesterol, HDL cholesterol, diabetes status, and GFR

<sup>^</sup>%change BMI = (Y30 BMI – Y25 BMI)/Y25 BMI X 100
